# Supplementary material for: Advancing micro-nano supramolecular assembly mechanisms of natural organic matter by machine learning for unveiling environmental geochemical processes
Source: Royal Society of Chemistry journal article supplement (doi:10.1039/d4em00662c), 2024-12-19
Supplement: d4em00662c1.pdf [file d4em00662c1.pdf]

## Supporting Information

### Advancing Micro-Nano Supramolecular Assembly Mechanisms of Natural Organic Matter by Machine Learning for Unveiling Environmental Geochemical Processes

Ming Zhang <sup>1</sup>, Yihui Deng <sup>2</sup>, Jiawei Zhou <sup>3</sup>, Jing Gao <sup>2</sup>, Daoyong Zhang <sup>1, \*</sup>,  
Xiangliang Pan <sup>2, \*</sup>

<sup>1</sup> College of Geoinformation, Zhejiang University of Technology, Hangzhou, 310014,  
P. R. China

<sup>2</sup> College of Environment, Zhejiang University of Technology, Hangzhou, 310014, P.  
R. China

<sup>3</sup> College of Computer Science and Technology, Zhejiang University of Technology,  
Hangzhou 310023, P. R. China

Corresponding authors:

Daoyong Zhang

E-mail address: [zhangdaoyong@zjut.edu.cn](mailto:zhangdaoyong@zjut.edu.cn)

Xiangliang Pan

E-mail address: [panxl@zjut.edu.cn](mailto:panxl@zjut.edu.cn)

### **Text S1. Additional descriptions about data acquisition**

The literature search was conducted based on the Web of Science Core Collection database. The literature search mainly focused on commonly used machine learning algorithms. The search formula is  $TI = ("machine\ learning" OR "deep\ learning" OR "supervised\ learning" OR "deep\ neural\ networks" (DNN) OR "xgboost" OR "long\ short\ term\ memory" (LSTM) OR "transformer" OR "random\ forest" OR "artificial\ neural\ network" (ANN) OR "support\ vector\ machine" OR "decision\ tree" OR "convolutional\ neural\ network" (CNN) OR "recurrent\ neural\ network" (RNN) OR "graph\ neural\ network" (GNN) OR "DNN" OR "CNN" OR "RNN" OR "GNN" OR "LSTM" OR "ANN") AND TI = ("supramolecular" OR "protein*" OR "peptide*" OR "lipid*" OR "polysaccharide*" OR "DNA" OR "RNA" OR "viral*" OR "dissolved\ organic\ matter" OR "natural\ organic\ matter" OR "solid\ organic\ matter" OR "humic*" OR "EPS" OR "biopolymer")$ . Document type was limited to article. The retrieval date was September 30, 2024. A total of 3482 articles were obtained. The software VOSviewer v.1.6.20 and Pajek v.5.19 were used to visualize and analyze the keyword co-occurrence in the literature.
